# Supplementary material for: Predictive Analytics for Readmission of Patients with Congestive Heart Failure
Source: Atypon-hosted journal article supplement (doi:10.1287/isre.2014.0553), 2014-11-24
Supplement: isre.2014.0553-sm-appendix_online_supplement.pdf [file isre.2014.0553-sm-appendix_online_supplement.pdf]

Appendix (Online Supplement)

# **Predictive Analytics for Readmission of Patients with Congestive Heart Failure**

Indranil Bardhan<sup>a</sup>, Jeong-ha (Cath) Oh<sup>b</sup>, Zhiqiang (Eric) Zheng<sup>a</sup>, Kirk Kirksey<sup>c</sup>

<sup>a</sup>Naveen Jindal School of Management, The Univ. of Texas at Dallas, Richardson, Texas  
75080

<sup>b</sup>Robinson College of Business, PO Box 4015, Georgia State University, Atlanta, Georgia  
30302-4015

<sup>c</sup>The University of Texas Southwestern Medical Center, 6303 Forest Park Road, Dallas,  
Texas 75390-8595

## Appendix A: Derivation of Equations in Section 3.2

A patient may be inactive either after T (i.e. still active at the end of period but no visit is observed between the last admission and the end of the period) or right after the last admission. We model these cases as follows:

i) A patient is inactive after T:

$$\begin{aligned}
 L(\lambda | t_1, \dots, t_j, T, \text{inactive at time } \tau \in (t_j, T]) \\
 &= \lambda^2 \phi(t_1) \psi(t_1, t_0) \exp[-\lambda \psi(t_1, t_0)] \times \lambda^2 \phi(t_2) \psi(t_2, t_1) \exp[-\lambda \psi(t_2, t_1)] \\
 &\quad \times \dots \times \lambda^2 \phi(t_j) \psi(t_j, t_{j-1}) \exp[-\lambda \psi(t_j, t_{j-1})] \times \exp[-\lambda \psi(T, t_j)] \\
 &= \lambda^{2J} \left( \prod_{j=1}^J \phi(t_j) \psi(t_j, t_{j-1}) \right) \exp \left( -\lambda \left( \sum_{j=1}^J \psi(t_j, t_{j-1}) + \psi(T, t_j) \right) \right)
 \end{aligned} \tag{9}$$

ii) A patient becomes inactive right after the last admission J:

$$\begin{aligned}
 L(\lambda | t_1, \dots, t_j, T, \text{inactive at time } \tau \in (t_j, T]) \\
 &= \lambda^2 \phi(t_1) \psi(t_1, t_0) \exp[-\lambda \psi(t_1, t_0)] \times \lambda^2 \phi(t_2) \psi(t_2, t_1) \exp[-\lambda \psi(t_2, t_1)] \\
 &\quad \times \dots \times \lambda^2 \phi(t_j) \psi(t_j, t_{j-1}) \exp[-\lambda \psi(t_j, t_{j-1})] \\
 &= \lambda^{2J} \left( \prod_{j=1}^J \phi(t_j) \psi(t_j, t_{j-1}) \right) \exp \left( -\lambda \sum_{j=1}^J \psi(t_j, t_{j-1}) \right)
 \end{aligned} \tag{10}$$

This yields the likelihood function:

$$\begin{aligned}
 L(\lambda, p, \gamma | X, J, t_j, T) &= (1-p)^J \lambda^{2J} \left( \prod_{j=1}^J \phi(t_j) \psi(t_j, t_{j-1}) \right) \exp \left( -\lambda \left( \sum_{j=1}^J \phi(t_j) \psi(t_j, t_{j-1}) + \psi(T, t_j) \right) \right) \\
 &\quad + \delta_{J>0} p(1-p)^{J-1} \lambda^{2J} \left( \prod_{j=1}^J \phi(t_j) \psi(t_j, t_{j-1}) \right) \exp \left( -\lambda \left( \sum_{j=1}^J \psi(t_j, t_{j-1}) \right) \right)
 \end{aligned} \tag{11}$$

Expectation over the distribution of  $\bullet$  yields to

$$L(r, \alpha, p, \gamma | X, J, t_j, T) = (1-p)^J \times A_1 + \delta_{J>0} p(1-p)^{J-1} \times A_2 \tag{12}$$

where,

$$\begin{aligned}
A_1 &= \int_0^\infty \lambda^{2J} \left( \prod_{j=1}^J \phi(t_j) \psi(t_j, t_{j-1}) \right) \exp \left( -\lambda \left( \sum_{j=1}^J \psi(t_j, t_{j-1}) + \psi(T, t_j) \right) \right) \frac{\alpha^r \lambda^{r-1} e^{-\alpha \lambda}}{\Gamma(r)} d\lambda \\
&= \left( \prod_{j=1}^J \phi(t_j) \psi(t_j, t_{j-1}) \right) \frac{\Gamma(r+2J) \cdot \alpha^r}{\Gamma(r)} \left( \alpha + \sum_{j=1}^J \psi(t_j, t_{j-1}) + \psi(T, t_j) \right)^{-(r+2J)}
\end{aligned} \tag{13}$$

$$\begin{aligned}
A_2 &= \int_0^\infty \lambda^{2J} \left( \prod_{j=1}^J \phi(t_j) \psi(t_j, t_{j-1}) \right) \exp \left( -\lambda \sum_{j=1}^J \psi(t_j, t_{j-1}) \right) \frac{\alpha^r \lambda^{r-1} e^{-\alpha \lambda}}{\Gamma(r)} d\lambda \\
&= \left( \prod_{j=1}^J \phi(t_j) \psi(t_j, t_{j-1}) \right) \frac{\Gamma(r+2J) \cdot \alpha^r}{\Gamma(r)} \left( \alpha + \sum_{j=1}^J \psi(t_j, t_{j-1}) \right)^{-(r+2J)}
\end{aligned} \tag{14}$$

Taking the expectation over  $\bullet$  and  $p$  yields the individual likelihood function,

$$\begin{aligned}
L_1(r, \alpha, a, b, \gamma | X, J, t_j, T) &= A_1 \times \int_0^1 (1-p)^J \frac{p^{a-1} (1-p)^{b-1}}{B(a, b)} dp + A_2 \times \int_0^1 p(1-p)^{J-1} \frac{p^{a-1} (1-p)^{b-1}}{B(a, b)} dp \\
&= \left( \prod_{j=1}^J \phi(t_j) \psi(t_j, t_{j-1}) \right) \cdot \frac{\Gamma(r+2J)}{\Gamma(r)} \cdot \alpha^r \cdot \frac{\Gamma(a+b) \Gamma(b+J-1)}{\Gamma(b) \Gamma(a+b+J)} \\
&\quad \cdot \left[ (b+J-1) \left( \alpha + \sum_{j=1}^J \psi(t_j, t_{j-1}) + \psi(T, t_j) \right)^{-(r+2J)} + \delta_{J>0} \cdot a \cdot \left( \alpha + \sum_{j=1}^J \psi(t_j, t_{j-1}) \right)^{-(r+2J)} \right]
\end{aligned} \tag{15}$$

# Appendix B

Figure B.1. Distribution of the Number of Admissions per Patient with CHF

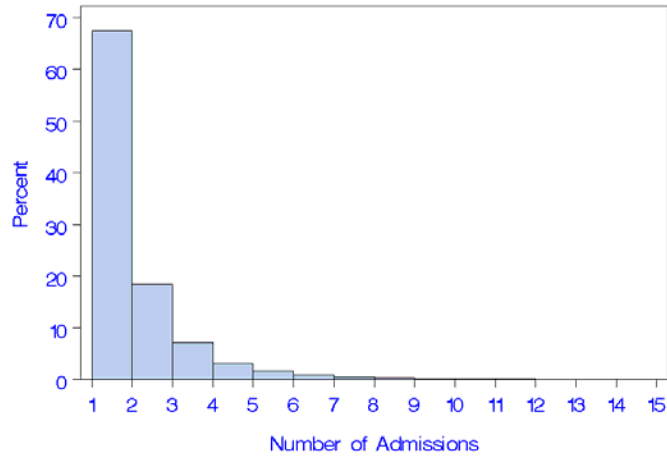

**Table B.1. Sample Summary**

|                                                                  |         |
|------------------------------------------------------------------|---------|
| Length of Admissions                                             | 4 years |
| Total Number of Observations                                     | 65,188  |
| Number of Patients                                               | 40,983  |
| Number of Hospitals                                              | 67      |
| Number of Patients with Multiple Hospitalizations                | 12,211  |
| Number of patients returning within 30 days from the first visit | 2,885   |

**Table B.2. Health Information Technology Factors**

| <b>Factor</b>             | <b>Application</b>                                 | <b>Factor Loading</b> |
|---------------------------|----------------------------------------------------|-----------------------|
| Administrative IT Systems | Accounts Payable                                   | 0.88                  |
|                           | Patient Billing                                    | 0.88                  |
|                           | ADT/Registration                                   | 0.88                  |
|                           | Chart Deficiency                                   | 0.79                  |
|                           | Chart Tracking/Locator                             | 0.79                  |
|                           | General Ledger                                     | 0.74                  |
| Clinical IT Systems       | Operating Room (Surgery) - Post-Operative          | 0.84                  |
|                           | Operating Room (Surgery) - Peri-Operative          | 0.83                  |
|                           | Operating Room (Surgery) - Pre-Operative           | 0.79                  |
|                           | Electronic Medication Administration Record (EMAR) | 0.76                  |
|                           | Computerized Practitioner Order Entry (CPOE)       | 0.70                  |
|                           | Respiratory Care Information System                | 0.69                  |
|                           | Business Intelligence                              | 0.68                  |
| Cardiology IT Systems     | Cardiology - Nuclear Cardiology                    | 0.81                  |
|                           | Cardiology - Cath Lab                              | 0.80                  |
|                           | Cardiology - Intravascular Ultrasound              | 0.80                  |
|                           | Cardiology - CT (Computerized Tomography)          | 0.79                  |
|                           | Cardiology - Echocardiology                        | 0.77                  |

## Appendix C: Lift Table

Our prediction outcomes are measured using a *lift table*, as shown in Table C.1, for the “horserace experiment” where we compare the predictive performance of six models: Random, Baseline Logit, NBD hurdle, EG Hurdle, BG/EG (without hurdle), and our proposed BG/EG Hurdle model. The probability of readmission for each patient is derived from the respective models.<sup>1</sup> If the model is random, then the top  $x\%$  (column 1) of the data is expected to contain  $x\%$  of the readmissions (column 2). If a model outperforms the random model, the top  $x\%$  of sorted customers should capture more than  $x\%$  of actual readmissions, i.e., a lift over the random model.

We observe that the BG/EG Hurdle model exhibits better predictive performance compared to other benchmarking models as a whole, followed by the BG/EG without hurdle, NBD hurdle, logit, EG hurdle and lastly random model, in that order. For example, at the top 5%, the baseline logit model captures 4.43% of the actual readmitted cases, while our model achieves 8.73%. On average, the BG/EG Hurdle model outperforms the logit model by 19.67% in terms of improvement in correctly predicting readmission cases, and outperforms the random and baseline models across all patient segments. Such improvements in prediction performance over the baseline model are substantial, especially if we focus on the top 25% of the readmitted patients where the improvement reaches 27.29%. In terms of prediction performance, the next best comparable model to the BG/EG Hurdle model is the BG/EG model without hurdle. Overall, BG/EG-Hurdle model outperforms BG/EG without hurdle by an average of 3.78%. If we focus on the top 25% of the readmitted patients, the improvement in predictive performance of the BG/EG-Hurdle model over the BG/EG without hurdle model is 4.45%.

---

<sup>1</sup> We do not present the proportional hazard model because of its low predictive performance. In most cases, the proportional hazard model performs even worse than the random model.

**Table C.1. Lift Table: Comparison of Predictive Performance across Multiple Models**

| Patient segment | Random | Baseline Logit | NBD-Hurdle | EG-Hurdle | BG/EG (no hurdle) | BG/EG-Hurdle |
|-----------------|--------|----------------|------------|-----------|-------------------|--------------|
| 5%              | 5%     | 4.43%          | 6.64%      | 6.09%     | 6.86%             | 8.73%        |
| 10%             | 10%    | 9.71%          | 12.65%     | 11.41%    | 13.97%            | 15.20%       |
| 15%             | 15%    | 15.80%         | 18.27%     | 16.95%    | 20.49%            | 22.49%       |
| 20%             | 20%    | 21.51%         | 25.00%     | 22.23%    | 26.02%            | 28.75%       |
| 25%             | 25%    | 27.47%         | 30.88%     | 28.15%    | 33.48%            | 34.97%       |
| 30%             | 30%    | 33.05%         | 36.54%     | 34.07%    | 40.29%            | 40.80%       |
| 35%             | 35%    | 39.14%         | 42.97%     | 39.52%    | 46.34%            | 47.87%       |
| 40%             | 40%    | 45.78%         | 49.70%     | 44.46%    | 53.41%            | 55.07%       |
| 45%             | 45%    | 51.75%         | 55.66%     | 49.28%    | 59.54%            | 58.94%       |
| 50%             | 50%    | 56.43%         | 60.52%     | 54.47%    | 64.22%            | 63.33%       |
| 55%             | 55%    | 61.93%         | 65.46%     | 58.69%    | 68.65%            | 67.29%       |
| 60%             | 60%    | 66.82%         | 69.80%     | 63.03%    | 72.44%            | 71.89%       |
| 65%             | 65%    | 70.83%         | 74.15%     | 67.29%    | 76.06%            | 76.83%       |
| 70%             | 70%    | 76.02%         | 78.24%     | 71.38%    | 79.34%            | 80.71%       |
| 75%             | 75%    | 80.71%         | 82.71%     | 76.36%    | 82.62%            | 84.54%       |
| 80%             | 80%    | 84.41%         | 86.41%     | 82.20%    | 85.90%            | 88.03%       |
| 85%             | 85%    | 88.88%         | 89.95%     | 87.05%    | 89.05%            | 91.40%       |
| 90%             | 90%    | 92.89%         | 93.14%     | 91.23%    | 93.02%            | 93.91%       |
| 95%             | 95%    | 97.02%         | 96.47%     | 95.57%    | 96.47%            | 97.40%       |
| 100%            | 100%   | 100.00%        | 100.00%    | 100.00%   | 100.00%           | 100.00%      |

## Appendix D: Estimation Results for All-period Readmissions Data

**Table D.1. Baseline All-period Readmissions**

| Variable                        | Logit Model        |                |            | Proportional Hazard Model |                |              |
|---------------------------------|--------------------|----------------|------------|---------------------------|----------------|--------------|
|                                 | Parameter Estimate | Standard Error | Odds Ratio | Parameter Estimate        | Standard Error | Hazard Ratio |
| Intercept                       | -2.644             | (0.504)***     | 0.071      |                           |                |              |
| Gender: Female                  | -0.027             | (0.011)***     | 0.973      | -0.041                    | (0.013)***     | 0.96         |
| Race: American Indian/Eskimo    | -0.725             | (0.296)***     | 0.484      | -0.368                    | (0.219)*       | 0.692        |
| Race: Asian or Pacific Islander | 0.213              | (0.108)**      | 1.237      | -0.054                    | (0.06)         | 0.948        |
| Race: Black                     | 0.464              | (0.079)***     | 1.591      | 0.192                     | (0.016)***     | 1.212        |
| Race: Other                     | -0.143             | (0.086)*       | 0.867      | -0.063                    | (0.0293)**     | 0.939        |
| log(disch_age)                  | 1.352              | (0.251)***     | 3.864      | 1.272                     | (0.202)***     | 3.568        |
| log(disch_age) <sup>2</sup>     | -0.217             | (0.034)***     | 0.805      | -0.205                    | (0.026)***     | 0.815        |
| Administrative IT               | -0.303             | (0.056)***     | 0.739      | -0.055                    | (0.035)*       | 0.947        |
| Clinical IT                     | 0.074              | (0.044)*       | 1.077      | 0.050                     | (0.026)**      | 1.051        |
| Cardiology IT                   | -0.207             | (0.033)***     | 0.813      | -0.059                    | (0.019)***     | 0.943        |
| Number of Procedures            | -0.080             | (0.007)***     | 0.924      | -0.069                    | (0.004)***     | 0.934        |
| log (LOS)                       | 0.129              | (0.017)***     | 1.138      | 0.065                     | (0.009)***     | 1.067        |
| Payer Type: Medicare            | 0.265              | (0.047)***     | 1.303      | 0.117                     | (0.025)***     | 1.124        |
| Payer Type: Medicaid            | 0.260              | (0.051)***     | 1.298      | 0.171                     | (0.026)***     | 1.186        |
| Payer Type: Private             | 0.131              | (0.044)***     | 1.14       | 0.038                     | (0.024)*       | 1.039        |
| Payer Type: Other               | 0.198              | (0.114)*       | 1.22       | 0.077                     | (0.062)        | 1.08         |
| Admission Type: Emergency       | 0.107              | (0.024)***     | 1.113      | 0.089                     | (0.014)***     | 1.094        |
| Risk Mortality                  |                    |                |            |                           |                |              |
| Level 2                         | 0.165              | (0.034)***     | 1.179      | 0.123                     | (0.019)***     | 1.131        |
| Level 3                         | -0.040             | (0.039)        | 0.961      | 0.029                     | (0.023)        | 1.029        |
| Level 4                         | -0.337             | (0.055)***     | 0.714      | -0.028                    | (0.033)        | 0.972        |
| Comorbidities                   |                    |                |            |                           |                |              |
| DiabetesMellitus                | 0.205              | (0.022)***     | 1.228      | 0.086                     | (0.013)***     | 1.089        |
| Hypertension                    | -0.048             | (0.026)*       | 0.953      | -0.017                    | (0.016)        | 0.984        |
| Periphery Vascular              | 0.044              | (0.036)        | 1.045      | 0.019                     | (0.021)        | 1.019        |
| Chronic Pulmonary               | 0.049              | (0.023)**      | 1.051      | 0.009                     | (0.013)        | 1.008        |
| Renal Failure                   | 0.163              | (0.029)***     | 1.177      | 0.053                     | (0.017)***     | 1.055        |
| Anemia                          | -0.055             | (0.025)**      | 0.946      | -0.027                    | (0.014)**      | 0.973        |
| Alcohol Abuse                   | -0.038             | (0.092)        | 0.963      | 0.042                     | (0.047)        | 1.042        |
| Drug Abuse                      | 0.515              | (0.073)***     | 1.673      | 0.256                     | (0.030)***     | 1.291        |
| Ischemic Disease                | 0.288              | (0.023)***     | 1.334      | 0.162                     | (0.013)***     | 1.176        |
| Number of Beds                  | 0.0002             | (0.0001)***    | 1          | 0.0000                    | (0.00003)*     | 1            |
| Tch_Hosp.                       | 0.153              | (0.030)***     | 1.166      | 0.081                     | (0.017)***     | 1.085        |
| CMI                             | -0.446             | (0.053)***     | 0.64       | -0.259                    | (0.032)***     | 0.772        |
| -2 Log L                        | 50400.78           |                |            | 478118.8                  |                |              |
| AIC                             | 50466.78           |                |            | 478182.8                  |                |              |

**Table D.2. All-period BG/EG Hurdle Estimation Results**

| Variable                        | Logit Hurdle       |                |            | BG/EG Model        |                |              |
|---------------------------------|--------------------|----------------|------------|--------------------|----------------|--------------|
|                                 | Parameter Estimate | Standard Error | Odds Ratio | Parameter Estimate | Standard Error | Hazard Ratio |
| Intercept                       | -3.399             | (0.295)***     | 0.033      |                    |                |              |
| Gender: Female                  | -0.081             | (0.019)***     | 0.922      | -0.105             | (0.011)***     | 0.894        |
| Black                           | 0.392              | (0.036)***     | 1.480      | 0.076              | (0.023)***     | 1.087        |
| Asian or Pacific Islander       | 0.099              | (0.021)***     | 1.105      | -0.010             | (0.002)***     | 0.989        |
| Other                           | 0.099              | (0.015)***     | 1.105      | 0.001              | (0.001)        | 1.001        |
| log(disch_age)                  | 0.517              | (0.099)***     | 1.678      | 1.414              | (0.037)***     | 4.400        |
| log(disch_age) <sup>2</sup>     | -0.036             | (0.013)***     | 0.964      | -0.293             | (0.010)***     | 0.616        |
| Health IT                       |                    |                |            |                    |                |              |
| Administrative IT               | -0.195             | (0.049)***     | 0.823      | -0.298             | (0.059)***     | 0.740        |
| Clinical IT                     | -0.107             | (0.014)***     | 0.898      | -0.098             | (0.050)*       | 0.901        |
| Cardiology IT                   | -0.284             | (0.032)***     | 0.753      | -0.315             | (0.023)***     | 0.705        |
| Number of Procedures            | -0.088             | (0.007)***     | 0.916      | 0.012              | (0.002)***     | 1.012        |
| log (LOS)                       | 0.107              | (0.009)***     | 1.113      | -0.006             | (0.005)        | 0.994        |
| Patient Stickiness              |                    |                |            | -0.151             | (0.031)***     | 0.870        |
| Payer Type: Medicare            | 0.102              | (0.015)***     | 1.107      | -0.304             | (0.028)***     | 0.727        |
| Payer Type: Medicaid            | 0.142              | (0.029)***     | 1.152      | -0.156             | (0.011)***     | 0.839        |
| Payer Type: Private             | 0.105              | (0.022)***     | 1.110      | 0.194              | (0.029)***     | 1.236        |
| Payer Type: Other               | 0.105              | (0.027)***     | 1.111      | 0.055              | (0.008)***     | 1.063        |
| Admission Type: Emergency       | 0.116              | (0.021)***     | 1.123      | -0.151             | (0.016)***     | 0.870        |
| Risk Mortality                  |                    |                |            |                    |                |              |
| Level 2                         | 0.306              | (0.052)***     | 1.358      | 0.020              | (0.003)***     | 1.022        |
| Level 3                         | 0.499              | (0.046)***     | 1.648      | -0.073             | (0.035)**      | 0.923        |
| Level 4                         | 0.492              | (0.044)***     | 1.635      | -0.082             | (0.021)***     | 0.912        |
| Comorbidities                   |                    |                |            |                    |                |              |
| DiabetesMellitus                | 0.024              | (0.002)***     | 1.025      | -0.224             | (0.017)***     | 0.786        |
| Hypertension                    | -0.082             | (0.021)***     | 0.921      | 0.209              | (0.018)***     | 1.251        |
| Periphery Vascular              | 0.020              | (0.002)***     | 1.021      | 0.021              | (0.004)***     | 1.024        |
| Chronic Pulmonary               | -0.013             | (0.002)***     | 0.987      | 0.074              | (0.023)***     | 1.084        |
| Renal Failure                   | 0.112              | (0.025)***     | 1.119      | 0.097              | (0.016)***     | 1.111        |
| Anemia                          | -0.022             | (0.008)***     | 0.978      | -0.052             | (0.025)**      | 0.945        |
| Alcohol Abuse                   | -0.312             | (0.053)***     | 0.732      | -0.031             | (0.009)***     | 0.966        |
| Drug Abuse                      | 0.706              | (0.077)***     | 2.026      | 0.115              | (0.051)**      | 1.137        |
| Ischemic Disease                | 0.185              | (0.035)***     | 1.203      | -0.013             | (0.007)*       | 0.987        |
| Number of Beds                  | 0.026              | (0.014)*       | 1.026      | -0.065             | (0.005)***     | 0.970        |
| Teaching Hosp.                  | 0.193              | (0.044)***     | 1.213      | 0.149              | (0.019)***     | 1.172        |
| CMI                             | -0.297             | (0.107)***     | 0.743      | -0.106             | (0.030)***     | 0.906        |
| Previous Discharge to Home/Self |                    |                |            | 0.051              | (0.007)***     | 1.055        |
| Previous ER reference           |                    |                |            | 0.011              | (0.008)        | 1.011        |
| r                               | 2.867              |                |            | mu                 | 0.01836        |              |
| alpha                           | 129.970            |                |            | sigma              | 0.11088        |              |
| a                               | 5.798              |                |            | log-likelihood     | -200082.2      |              |
| b                               | 6.100              |                |            | AIC                | 400304.41      |              |
